# Supplementary material
Source: publisher figshare collection journal article supplement (https://sage.figshare.com/ndownloader/files/14652056)
Supplement: Supplementary file 1 [file 14652056]

**Appendix 1:** Archrival acquired for this research.

| No. | Archival List                                                          | Illustration                                                                                                                              |
|-----|------------------------------------------------------------------------|-------------------------------------------------------------------------------------------------------------------------------------------|
| 1   | Nanchuan Tourism Authority Records                                     | Introduction of JNSA authority transition up to 2006. Also, many important events, such as institutional reform were recorded.            |
| 2   | Research on the culture and history of Mount Jinfo                     | History of Mount Jinfo.                                                                                                                   |
| 3   | Master plan of Jinfo National Scenic Area (1991-2010)                  | Include planning text, instructions and blueprint, etc. It reflects how JNSA authority influenced the developed strategy in early period. |
| 4   | Master plan Revision of Jinfo National Scenic Area (2008-2020)         | It reflects how management strategies were changed with JNSA authority changing.                                                          |
| 5   | Core Area Plan of Jinfo National Scenic Area (2003)                    | It is an important literature reflects how did integration type authority dominate a conservation plan.                                   |
| 6   | Master plan of Jinfo National Scenic Area (2014-)                      | Include draft of the planning text, instructions and blueprint.                                                                           |
| 7   | Master Plan of Nanchuan City (2006-2020)                               | Include planning text, instructions, blueprint and compilation of basic materials.                                                        |
| 8   | Jinfo Scenic Area Commercial Activities Management Regulation (2014)   | It reflects conservation-oriented type authority aimed at control disorderliness commercial activities in scenic areas.                   |
| 9   | Jinfo Scenic Area Construction Regulation (2014)                       | Announced by JMMC. The same as above.                                                                                                     |
| 10  | Jonfo Scenic Area Tourism Service Quality Management Regulation (2014) | Announced by JMMC. The same as above.                                                                                                     |
| 11  | Tourism Master Plan of Nachuan City (2010-2020)                        | It reflects how local towns expanded quickly.                                                                                             |
| 12  | Master Land Use Plan of Nanchuan City (2006-2020)                      | Land use Blueprint of Nanchuan City.                                                                                                      |
